1 **Siliplant1 (Slp1) protein precipitates silica in sorghum silica cells**

2 **Santosh Kumar<sup>1,a</sup>, Nurit Adiram-Filiba<sup>2</sup>, Shula Blum<sup>1</sup>, Javier Arturo Sanchez-Lopez<sup>3</sup>,**  
3 **Oren Tzfidia<sup>4</sup>, Ayelet Omid<sup>5</sup>, Hanne Volpin<sup>5</sup>, Yael Heifetz<sup>3</sup>, Gil Goobes<sup>2</sup> and Rivka**  
4 **Elbaum<sup>1</sup>**

5 (S.K. ORCID ID: 0000-0001-8261-5620)

6 <sup>1</sup>Robert H Smith Faculty of Agriculture, Food and Environment, Robert H Smith Institute of  
7 Plant Sciences and Genetics in Agriculture, Hebrew University of Jerusalem, Rehovot  
8 7610001, Israel; <sup>2</sup>Department of Chemistry, Bar-Ilan University, Ramat Gan 5290002, Israel;  
9 <sup>3</sup>Department of Entomology, Robert H Smith Faculty of Agriculture, Food and Environment,  
10 Hebrew University of Jerusalem, Rehovot 7610001, Israel; <sup>4</sup>Bioinformatics and Systems  
11 Biology, VIB/Ghent University, Gent B-9052, Belgium; <sup>5</sup>Danziger Innovations Limited,  
12 Mishmar Hashiva 5029700, Israel

13  
14 <sup>a</sup>Present address: Department of Plant and Environmental Sciences, Weizmann Institute of  
15 Science, Rehovot 7610001, Israel

16  
17 Address for correspondence:

18 *Santosh Kumar*

19 *Tel: +972-544378508*

20 *Email: skg.research@gmail.com*

21  
22 *Rivka Elbaum*

23 *Tel: +972-8-9489335*

24 *Email: rivka.elbaum@mail.huji.ac.il*

25

|                                                               |             |                                     |                                         |
|---------------------------------------------------------------|-------------|-------------------------------------|-----------------------------------------|
| Total word count (excluding summary, references and legends): | <b>6230</b> | No. of figures:                     | 7 (all in colour)                       |
| Summary:                                                      | <b>200</b>  | No. of Tables:                      | nil                                     |
| Introduction:                                                 | <b>926</b>  | No of Supporting Information files: | 3<br>(1) Supplementary Text and figures |

|                        |             |  |                              |
|------------------------|-------------|--|------------------------------|
|                        |             |  | (2) Video S1<br>(3) Video S2 |
| Materials and Methods: | <b>2103</b> |  |                              |
| Results:               | <b>2072</b> |  |                              |
| Discussion:            | <b>986</b>  |  |                              |
| Accession number       | <b>48</b>   |  |                              |
| Acknowledgements:      | <b>95</b>   |  |                              |

26

27

## 28 **Summary**

- 29 • Silicon is absorbed by plant roots as silicic acid. The acid moves with the transpiration  
30 stream to the shoot, and mineralizes as silica. In grasses, leaf epidermal cells called  
31 silica cells deposit silica in most of their volume by unknown mechanism.
- 32 • Using bioinformatics tools, we identified a previously uncharacterized protein in  
33 sorghum (*Sorghum bicolor*), which we named Siliplant1 (Slp1). Silica precipitation  
34 activity *in vitro*, expression profile, and activity in precipitating biosilica *in vivo* were  
35 characterized.
- 36 • Slp1 is a basic protein with seven repeat units rich in proline, lysine, and glutamic acid.  
37 A short peptide, repeating five times in the protein precipitated silica *in vitro* at a  
38 biologically relevant silicic acid concentration. Raman and NMR spectroscopies  
39 showed that the peptide attached the silica through lysine amine groups, forming a  
40 mineral-peptide open structure. We found Slp1 expression in immature leaf and  
41 inflorescence tissues. In the immature leaf active silicification zone, Slp1 was localized  
42 to the cytoplasm or near cell boundaries of silica cells. It was packed in vesicles and  
43 secreted to the paramural space. Transient overexpression of Slp1 in sorghum resulted  
44 in ectopic silica deposition in all leaf epidermal cell types.
- 45 • Our results show that Slp1 precipitates silica in sorghum silica cells.

46

47

48 **Keywords:** active silicification zone (ASZ), biomineralization, phytolith, silica cell,  
49 silicification, silicon, Siliplant1 (Slp1), *Sorghum bicolor*

50

51

## 52 **Introduction**

53 Grasses are well known for their high silica ( $\text{SiO}_2 \cdot n\text{H}_2\text{O}$ ) content, reaching up to 10% of their  
54 dry weight (Hodson *et al.*, 2005). Silicon is available to plants as mono-silicic acid [ $\text{Si}(\text{OH})_4$ ]  
55 whose concentration in soil solution usually varies between 0.1 to 0.6 mM (Epstein, 1994).  
56 Grass roots actively uptakes silicic acid from soil (Ma *et al.*, 2006, 2007) of which more than  
57 90% is loaded into the xylem. A cooperative uptake of silicic acid by two root transporters  
58 leads to Si supersaturation in the grass xylem sap (Sakurai *et al.*, 2015). Si concentration may  
59 reach 5-7.5 mM, which is 3 to 4 times higher than its saturation concentration (Ma *et al.*, 2002;  
60 Casey *et al.*, 2003; Mitani & Ma, 2005). Silicic acid molecules then move with water inside  
61 the plant body to reach the shoots where they are unloaded from the xylem (Yamaji *et al.*,  
62 2008). Finally, silicic acid polymerises as solid biogenic silica at several locations inside the  
63 plant body. The most prominent sites of silica deposition in grasses are the walls of leaf  
64 epidermal cells, abaxial epidermal cells of the inflorescence bracts (glumes and lemma) and  
65 root endodermal cells. The silicification mechanism across the cell types is not uniform.  
66 Models of deposition suggest either spontaneous formation as a result of evapo-transpirational  
67 loss of water, or a tightly controlled process (Kumar *et al.*, 2017b). Uptake of silicic acid and  
68 its deposition are also affected by plant mechanical damage (McLarnon *et al.*, 2017), and  
69 possibly other unknown physiological factors affecting root silicon transporters (Talukdar *et*  
70 *al.*, 2019).

71 One of the cell types most frequently silicified in grass leaves is silica cells (Motomura *et al.*,  
72 2000; Kumar & Elbaum, 2018). Silica cells are specialized epidermal cells occurring mostly  
73 as silica-cork cell pairs, both above and below the leaf longitudinal veins (Kaufman *et al.*,  
74 1985), on internode epidermis (Kaufman *et al.*, 1969) and on the abaxial epidermis of glumes  
75 (Hodson *et al.*, 1985). We earlier estimated that the whole process of leaf silica cell  
76 silicification is completed within 10 hours of cell division (Kumar & Elbaum, 2018). Within  
77 this time period, almost the entire cell lumen is filled with solid silica (Hodson *et al.*, 1985).  
78 Silica cell silicification is immediately followed by cell death (Kumar & Elbaum, 2018) which  
79 ceases the silicification process (Markovich *et al.*, 2015; Kumar *et al.*, 2017a; Kumar &  
80 Elbaum, 2018). Silicification in silica cells is thus different than silicification in macro-hairs  
81 and abaxial epidermal cells in lemma where silica deposition takes place in a course of weeks  
82 on the thickened cell wall material (Hodson *et al.*, 1984; Perry *et al.*, 1984), or in glume prickle  
83 hairs and papillae where silica is deposited in the empty lumen of these cells even after cell  
84 death (Hodson *et al.*, 1985). The template on which silica cells deposit silica is unknown. Cell

85 wall polysaccharides such as mixed-linkage glucan (Fry *et al.*, 2008; Kido *et al.*, 2015) and  
86 callose (Law & Exley, 2011; Brugiére & Exley, 2017; Kulich *et al.*, 2018) have been suggested  
87 as a template for silicification in plants. However, lumen silica structure of *Triticum durum*  
88 silica cells has continuously distributed organic matter with the N/C ratio indicative of amino  
89 acids (Alexandre *et al.*, 2015). This suggests protein(s) as the templating organic matrix for the  
90 silicification process in silica cells.

91 Silicification is widespread among living beings from unicellular microbes to highly evolved  
92 multicellular organisms (Perry, 2003). Several bio-silica associated proteins have been  
93 reported, for example, silaffins (Kröger *et al.*, 1999; Poulsen & Kröger, 2004), silacidins  
94 (Wenzl *et al.*, 2008) and silicanin-1 (Kotzsch *et al.*, 2017) from diatoms; and silicateins  
95 (Shimizu *et al.*, 1998) and glassin (Shimizu *et al.*, 2015) from sponges. Among plants, a short  
96 peptide derived from an inducible proline-rich protein precipitates silica *in vitro*. The protein,  
97 involved in systemic acquired resistance in cucumber, may precipitate silica locally at  
98 attempted fungal penetration sites (Kauss *et al.*, 2003). All the above-mentioned protein groups  
99 do not share sequence homology.

100 To study silica deposition in silica cells, we used sorghum (*Sorghum bicolor*), a member of the  
101 grass (Poaceae) family. Sorghum is categorized as an active silica accumulator (Hodson *et al.*,  
102 2005; Coskun *et al.*, 2018). In grasses, leaves appear successively (Skinner & Nelson, 1995).  
103 Even within an individual leaf, there is a gradient of cell maturation. The leaf epidermal cell  
104 division zone is confined to the base of the leaf and the newly divided cells displace the  
105 maturing cells away from the leaf base. Hence, leaf epidermal cells that are close to the leaf  
106 apex are older than the cells close to the base (Skinner & Nelson, 1995).

107 We earlier found that silica cell silicification is confined to elongating leaves, in a well-defined  
108 active silicification zone (ASZ) (Kumar *et al.*, 2017a; Kumar & Elbaum, 2018). The  
109 mineralization initiates in the paramural space of viable silica cells, producing a thick silica  
110 cell wall, and restricting the cytoplasmic space to smaller and smaller volumes (Kumar *et al.*,  
111 2017a; Kumar & Elbaum, 2018). During this fast process, the cell maintains cell-to-cell  
112 connectivity to the neighbouring cells through plasmodesmata (Kumar *et al.*, 2017a). As the  
113 silicic acid resides in the apoplast in supersaturation, a crucial stage would be the initiation of  
114 controlled silica deposition. A possible way would be by adding to the cell wall a  
115 biomineralizing protein in appropriate time and place. Here, we report on a previously  
116 uncharacterized protein that is expressed in silica cells, exported to the cell wall during their

117 silicification, and induces precipitation of silica *in planta*. Hence, we named this protein as  
118 Siliplant1 (Slp1).

## 119 **Materials and Methods**

### 120 **Plant material, growth conditions and tissue nomenclature**

121 Seeds of *Sorghum bicolor* (L.) Moench (line BTx623) were surface sterilized and grown in soil  
122 as reported previously (Kumar & Elbaum, 2018). Unless indicated otherwise, we used sorghum  
123 seedlings of about 2 weeks of age for our studies. Immature, silicifying leaves (L<sub>IS</sub>) in our  
124 present study is analogous to leaf-2, as reported in our earlier studies (Kumar & Elbaum, 2017,  
125 2018; Kumar *et al.*, 2017a). The immature leaf was cut into five equal segments. The middle  
126 segment is most active in terms of silica cell silicification (Kumar *et al.*, 2017a; Kumar &  
127 Elbaum, 2018) and was named active silicification zone (ASZ). The segment just older than  
128 ASZ (towards leaf tip) was named ASZ+1, while the segment just younger than ASZ (towards  
129 leaf base) was ASZ-1. The youngest segment (at leaf base) was named ASZ-2. Mature leaves  
130 were cut into 10 equal segments and only the eighth segment from the leaf-base was used for  
131 all the experiments.

### 132 **Sequence-based analyses of Slp1**

133 Secondary structure prediction was done using the program GOR4 (Combet *et al.*, 2000).  
134 Intrinsically disordered tertiary structure was predicted using IUPred (Dosztányi *et al.*,  
135 2005a,b). The prediction type we chose was ‘long disorder’. Residues with score greater than  
136 0.5 were regarded disordered. SignalP was used to predict signal peptide in Slp1 (Petersen *et al.*,  
137 2011). TargetP was used to predict whether the protein is secretory in nature (Emanuelsson  
138 *et al.*, 2000). The organism group selected was ‘plant’ and the program was run with default  
139 cutoff selection.

### 140 **Silica precipitation using Peptide-1 and Peptide-3**

141 We tested the peptide sequence HKKPVPPKPKPEPK (Peptide-1) which appears 5 times in  
142 Slp1 primary sequence for its silica precipitating activity *in vitro*, and compared it to a mutated  
143 peptide, where all lysine groups were replaced by alanine (HAAPVPPAPAPEPA, Peptide-3).  
144 We freshly prepared 1 M silicic acid solution by mixing 150 µl of tetramethyl orthosilicate to  
145 850 µl of 1 mM HCl for four minutes under gentle stirring.

146 For small-scale silica precipitation at 90.9 mM silicic acid, 5 µl of 1 M silicic acid solution was  
147 mixed with 50 µl of peptide solution (1.5 or 2.0 mg ml<sup>-1</sup> in 0.1 M potassium phosphate buffer,

148 pH 7.0) and incubated for 5 minutes under gentle shaking at room temperature. For silica  
149 precipitation at 5 mM silicic acid, 55  $\mu\text{l}$  of freshly prepared 1 M silicic acid solution was diluted  
150 in 945  $\mu\text{l}$  of 0.1 M potassium phosphate buffer (pH 7.0), of which 10  $\mu\text{l}$  was mixed with 100  
151  $\mu\text{l}$  of Peptide-1 solution (1.5  $\text{mg ml}^{-1}$  in 0.1 M potassium phosphate buffer, pH 7.0) and  
152 incubated for 30 min under gentle shaking condition. The same reactions lacking any peptide  
153 served as control. Sediment was collected by centrifugation at 14000 g for 5 minutes. The  
154 supernatant was thrown, and the pellet was washed thrice with 1 ml  $\text{H}_2\text{O}$ .

155 For large-scale precipitating of circa 100 mg of silica we incubated 30 mg of peptide (1.5 mg  
156  $\text{ml}^{-1}$  in 0.1 M potassium phosphate buffer, pH 7.0) with 2 ml of freshly prepared 1 M silicic  
157 acid solution for 30 min at room temperature under gentle shaking condition. The precipitate  
158 with Peptide-1 was collected by centrifugation at 5000 X g for 5 minutes and washed thrice by  
159  $\text{H}_2\text{O}$ . The precipitate with Peptide-3 was collected by centrifugation at 5000 X g for 20 min  
160 and washed thrice with  $\text{H}_2\text{O}$ . Both the precipitates were dried at 60 °C.

#### 161 **Scanning electron microscopy (SEM)**

162 The pellet of the small-scale reaction was suspended in  $\text{H}_2\text{O}$  and 1  $\mu\text{l}$  of the suspension was  
163 smeared on carbon tape, air dried and coated with iridium. The coated sample was observed in  
164 Jeol JSM IT100 (Peabody, MA, USA) scanning electron microscope (SEM).

#### 165 **High resolution transmission electron microscopy (HRTEM)**

166 Powder from peptide-1 large-scale precipitation was resuspended in double distilled water and  
167 spread on a TEM grid. HRTEM measurements were carried out on a JEM 2100 JEOL  
168 microscope. The samples were imaged at an electron-beam accelerating voltage of 200 kV.  
169 The images were collected to characterize the silica internal structure.

170

#### 171 **Raman spectroscopic observation of Peptide-1 and silica precipitated with Peptide-1**

172 Lyophilized peptide solution was reconstituted in double distilled water (50  $\text{mg ml}^{-1}$ ) and 1  $\mu\text{l}$   
173 of this solution was put on a steel slide and dried at 37 °C for 30 minutes before measuring the  
174 Raman spectra.

175 The small-scale precipitation of 90.9 mM silicic acid with peptide-1 was dried at 60 °C until  
176 attaining a constant dried weight. The dried powder was mounted on a steel slide. Raman  
177 spectra of the samples were collected using InVia microspectrometer (Renishaw, New Mills,  
178 UK) equipped with polarized 532 nm laser (45 mW max. intensity, 4  $\mu\text{m}^2$  beam) excitation

179 under a 50X air objective lens (NA=0.75). Spectra analysis was done in WiRE3 (Renishaw),  
180 including smoothing, background subtraction, and peak picking.

### 181 **Solid state NMR spectroscopy**

182 Solid state NMR spectra of the peptide-1 large-scale precipitation were recorded on a Bruker  
183 11.7 T Avance III spectrometer (Billerica, MS, USA) equipped with a 4 mm VTN CPMAS  
184 probe at a spinning rate of 10 kHz. The <sup>29</sup>Si cross polarization experiment was done with 8192  
185 scans and recycle delay of 6 sec and the <sup>29</sup>Si direct excitation experiment was recorded with  
186 2560 scans and recycle delay of 60 sec. Analysis of the <sup>29</sup>Si spectrum was done using the  
187 DMFIT program (Massiot *et al.*, 2002). <sup>13</sup>C cross polarization was done with 2048 scans using  
188 recycle delay of 5 sec.

### 189 **Tissue-specific expression of Slp1 in sorghum**

190 Polyclonal antibodies against Peptide-1 was raised in rabbit (GenScript, NJ, USA). Crude  
191 proteins from root tissues, whole of immature silicifying leaves, mature leaves and immature  
192 inflorescence (expected to emerge from the flag leaf of mature plants within about a week)  
193 were extracted in the extraction buffer (0.1 M potassium phosphate buffer, pH 7.0; 1% protease  
194 inhibitor cocktail, Sigma and 0.1% 2-Mercaptoethanol). Forty-eight µg of the extracted protein  
195 from each sample was loaded in separate wells and run on 15% polyacrylamide separating gel  
196 under denaturing condition. The gel was blotted onto nitrocellulose membrane and the  
197 membrane was put in blocking buffer (5% milk powder in Tris buffer saline, 0.1% Tween 20)  
198 for one hour. We incubated the membrane with purified polyclonal antibody against Peptide-1  
199 (1 µg ml<sup>-1</sup>) at 4 °C for overnight. The membrane was washed and incubated with secondary  
200 antibody (anti-rabbit IgG mouse monoclonal antibody, Genscript, NJ, USA) conjugated with  
201 Horseradish peroxidase. Chemiluminescence was developed (PerkinElmer, Akron, US) and  
202 the membrane was scanned for one second exposure time.

### 203 **Transcript abundance of *Slp1***

204 To check transcription of *Slp1* in immature leaf, mature leaf and immature inflorescence, RNA  
205 was isolated from these tissues and cDNA was synthesized using 1 µg of total RNA after on  
206 column-DNase treatment (Zymoresearch, CA, USA). Equal volume of cDNA was PCR  
207 amplified using the primers specific for *Slp1* (Slp1-RT-F and Slp1-RT-R) and ubiquitin-  
208 conjugating enzyme (*UbCE*; Sb09g023560) as internal control (Shakoor *et al.*, 2014;  
209 Markovich *et al.*, 2015). The primer pair used to amplify *UbCE* was *UbCE*-RT-F and *UbCE*-  
210 RT-R. Nucleotide sequences of primers are given in Supporting Information Table S1.

211 To measure relative transcript abundance of *Slp1* in ASZ-2, ASZ-1, ASZ, ASZ+1 and the  
212 youngest mature leaf, three independent sorghum seedlings with immature leaf length between  
213 13-16 cm were used. The youngest mature leaves were used as a measure of background  
214 transcription level of *Slp1* as silica cells in these regions are dead and silicification is no longer  
215 taking place in them (Kumar & Elbaum, 2018). RNA isolation and cDNA synthesis were  
216 carried out as written above. Reactions were performed using SYBR mix (Invitrogen, MA,  
217 USA) in 7300 Real Time PCR machine (Applied Biosystems, MA, USA) as explained before  
218 (Markovich *et al.*, 2015) except that the primer concentrations were kept at 150 nM each. A  
219 melt curve analysis at the end of the PCR cycle was carried out to ensure that only one PCR  
220 product was formed. *Slp1* and *UbCE* transcripts were amplified using primers as mentioned  
221 above. In addition, we also amplified transcripts of an RNA recognition motif-containing  
222 protein (*RRM*; Sb07g027950) as another internal control (Shakoor *et al.*, 2014) using the  
223 primers RRM-RT-F and RRM-RT-R (Table S1).

224 Using *UbCE* as internal control, the relative transcript abundance of *Slp1* was calculated  
225 according to the formula of (Pfaffl, 2001). The relative transcript level of *RRM* is also reported,  
226 showing that the transcript level of the two house-keeping genes do not change significantly in  
227 the tested tissues (Supporting Information Fig. S1).

### 228 **Immunolocalization of Slp1 in sorghum leaves**

229 Leaf tissues from ASZ and mature leaves were cut into about 1 mm X 1 mm pieces and fixed  
230 in 4% para-formaldehyde (w/v) containing 0.05% triton X-100 using vacuum infiltration.  
231 Blocking was done in PBS buffer containing 0.1% BSA. The tissue sections were incubated  
232 with purified polyclonal antibody against Peptide-1 (10  $\mu\text{g ml}^{-1}$ ) for one hour at room  
233 temperature. After washing, the tissue sections were incubated with secondary antibody (goat  
234 anti-rabbit IgG) tagged with Alexa flour 488. The tissue sections were further washed and  
235 incubated for 10 min in propidium iodide (5  $\mu\text{g ml}^{-1}$ ) solution to stain the cell wall red. Tissue  
236 sections undergone the same treatment (i) with pre-immune serum, or (ii) without the primary  
237 or the secondary; or without both the antibodies worked as control. The tissue segments were  
238 mounted on microscopic slide and observed under Leica SP8 inverted confocal laser scanning  
239 microscope with solid-state laser (Wetzlar, Germany). The excitation wavelength was 488 nm  
240 while the emission filter range was 500-550 nm for Alexa flour 488. Propidium iodide was  
241 excited at 514 nm and the emission filter range was 598-634 nm.

### 242 **Transient overexpression of Slp1 in tobacco (*Nicotiana benthamiana* Domin)**



243 pBIN-19 plasmid was modified by inserting CaMV35S promoter in between HindIII and SalI  
244 restriction sites, whereas GFP followed by NOS terminator was inserted in between XbaI and  
245 EcoRI restriction sites. The resulting plasmid (pBIN-GFP) was used as control plasmid to drive  
246 the expression the GFP under the control of CaMV35S promoter. Primers Slp1-SalI-F and  
247 Slp1-XbaI-R (Table S1) were used to amplify the full length of Slp1 without the stop codon  
248 and flanked with the restriction sites SalI and XbaI, respectively. The PCR product was  
249 digested with SalI and XbaI and ligated to the SalI and XbaI digested pBIN-GFP plasmid. The  
250 expression cassette consisted of CaMV35S promoter-Slp1-GFP-NoS terminator. We  
251 immobilized the plasmids into *Agrobacterium tumefaciens* (strain EHA105) and infiltrated  
252 *Nicotiana benthamiana* source leaves on the abaxial side with slight modifications from the  
253 reported protocol (Li, 2011). Our resuspension solution consisted of 50 mM MES buffer, 2  
254 mM NaH<sub>2</sub>PO<sub>4</sub> supplemented with 200 μM acetosyringone. After 48 hours, leaf pieces were  
255 observed under laser scanning confocal microscope (excitation: 488 nm; emission filter range:  
256 500-550 nm).

### 257 **Transient overexpression of Slp1 in sorghum**

258 We created a construct exploiting the maize dwarf mosaic virus (MDMV) genome  
259 (<https://patentscope.wipo.int/search/en/detail.jsf?docId=WO2016125143>). We fused the  
260 expression cassette containing a CaMV35S promoter driving the expression of Slp1 and *nos*-  
261 terminator in between *AgeI* and *ApaI* restriction sites to the MDMV genome as follows. We  
262 amplified full length of Slp1 except the start and stop codons using the primers Slp1-AgeI-F  
263 and Slp1-ApaI-R (Table S1). After digestion of the PCR product with *AgeI* and *ApaI* restriction  
264 enzymes, we ligated the digested PCR product with *AgeI* and *ApaI* digested MDMV-GUS  
265 plasmid. The resulting plasmid was named MDMV-Slp1. The plasmids were coated on gold  
266 microparticles (1 μm diameter, Bio-Rad, California, USA) and bombarded on about one week  
267 old sorghum seedlings according to the protocol of (Jose-Estanyol, 2013) with the differences  
268 explained below. Sorghum seeds were surface sterilized, germinated and then grown with their  
269 roots immersed in tap water for up to seven days before they were bombarded. Just before  
270 bombardment, the seedling roots were quickly taken out of water, and a bunch of five seedlings  
271 were arranged and loosely stuck in the center of a petri dish and bombarded with the plasmid  
272 coated gold particles using 1100 psi rupture discs. After bombardment, the seedlings roots were  
273 wrapped in moist tissue paper and put in a beaker with tap water for 24 hours, after which the  
274 bombarded seedlings were transferred to soil. The seedlings were grown for about three weeks  
275 and the phenotypes in the leaves showing viral symptoms were observed in the SEM. RNA

276 was isolated from the young leaves of the infected plants and cDNA was synthesized. Primers  
277 derived from the MDMV-Slp1 plasmid (MDMV-Slp1-F and MDMV-Slp1-R, Table S1) were  
278 used to amplify Slp1 with viral flanking regions, or primers from viral protein coat (MDMV-  
279 Coat-F and MDMV-Coat-R, Table S1) were used to ascertain the viral infection in the control  
280 plants (infected by MDMV-GUS plasmid). We conducted this experiment twice, each time  
281 starting with 15 independent biological replicates and analysing altogether 10 plants showing  
282 strong viral symptoms.

## 283 **Results**

### 284 **Screening for putative silicification protein(s)**

285 In order to find candidate silicification regulating factors, we analysed a publicly available data  
286 set which reports the influence of silicon treatments on gene expression in wheat (GEO NCBI  
287 dataset GSE12936) (Chain *et al.*, 2009), as both sorghum and wheat belong to Poaceae (grass)  
288 family. We searched for genes that co-express with wheat silicon transporters (*TaLsi1*, *TaLsi2*,  
289 *TaLsi6*) irrespective of the plant pathogenic infection status, using Comparative Co-Expression  
290 Network Construction and Visualization (CoExpNetViz) online tool (Tzfadia *et al.*, 2016).  
291 Once co-expressed genes were identified, their probe sequences were extracted and used to  
292 BLAST against the sorghum genome. The BLAST yielded a list of 18 sorghum orthologues  
293 genes (e-value > 100 was used as orthology cutoff) (Table S2). The primary sequence of all  
294 the initially screened proteins were analysed for the theoretical isoelectric point (pI) using  
295 ProtParam tool in ExPASy server (<https://web.expasy.org/protparam/>); and the presence of  
296 predicted signal peptide (SignalP server). Since positively charged amino acids have been  
297 shown involved in biological silicification, we discarded all the proteins with predicted pI value  
298 less than 7. We also rejected the proteins that lacked signal peptide as a silicifying protein must  
299 be secreted outside the silica cell membrane in order for silicification to take place in the  
300 paramural space. Proteins were further screened for the presence of internal repeat units as  
301 found in several silica precipitating proteins (Kröger *et al.*, 1999; Kauss *et al.*, 2003; Shimizu  
302 *et al.*, 2015), abundance of histidine, glutamic acid (Shimizu *et al.*, 2015), lysine (Kröger *et al.*,  
303 1999; Kauss *et al.*, 2003) or serine, glycine-rich motifs, and frequency of proline-lysine and  
304 proline-glutamic acid residues (Harrison, 1996). Based on our selection criteria, we identified  
305 a protein in sorghum (Sb01g025970) that had seven repeat units rich in lysine, similar to  
306 silaffins from *Cylindrotheca fusiformis*, a diatom species (Kröger *et al.*, 1999); histidine-  
307 aspartic acid rich regions similar to glassin from a marine sponge, *Euplectella* (Shimizu *et al.*,

2015), and several proline residues as in a proline-rich protein (PRP1) from cucumber (Kauss  
*et al.*, 2003). We functionally characterized this protein and named it Siliplant1 (Slp1).

### 310 **Molecular architecture of Sorghum Slp1**

311 Sorghum Slp1 comprises of 524 amino acids with a predicted N-terminal signal sequence (Fig.  
312 1). The signal sequence is predictably cleaved between amino acid positions 24 and 25. Further  
313 sequence characterization using TargetP predicted Slp1 to be a secretory protein with high  
314 probability. BLAST-based homology search revealed that Slp1 is a single copy gene in  
315 sorghum and belongs to a family of proline-rich proteins with unknown function. The transcript  
316 of this protein is highly abundant in young leaves and inflorescences (MOROKOSHI, © 2018  
317 RIKEN, query Sobic.001G265900). Slp1 is rich in proline, lysine, and histidine, respectively  
318 comprising 20%, 13%, and 11% of total amino acids. The theoretical pI value of the protein is  
319 9.28. Structure predictions using GOR4 (Combet *et al.*, 2000) suggest that about 80% of the  
320 protein is random coil and 14% is alpha helix. IUPred suggested that Slp1 has intrinsically  
321 disordered tertiary structure (Dosztányi *et al.*, 2005a,b). Slp1 has repeat units (R1 to R7) rich  
322 in proline, lysine, and glutamic acid (P, K, E-rich domain) with the consensus sequence  
323 KKPXPXKPKXPXPKXPXPX. Near a wide range of physiological pH, close to half of this  
324 domain is positively charged (lysine-rich) and the rest of the domain is negatively charged  
325 (aspartic acid-rich). Five of the repeat units (except R1 and R3) have a histidine and aspartic  
326 acid (H, D) rich domain with the consensus sequence DXFHKXHDYHXXXXHFH  
327 immediately preceding the P, K, E-rich domain. This aspartic acid rich domain is negatively  
328 charged under physiological pH. In five repeats (except R2 and R4) there is a third domain  
329 following the P, K, E-rich domain, rich in proline, threonine and tyrosine (P,T,Y-rich) with the  
330 consensus sequence YHXPXPTYXSPTPIYHPPX. Before the start of the repeat units (amino  
331 acids 1-148), there is a region rich in alanine, serine, glycine and valine (comprising together  
332 45% of the region). At the end of R1, R3, and R5, we found an RXL domain. This domain acts  
333 as recognition site for unknown proteases that cleave at the C-terminus of the leucine residue  
334 of the RXL domain in many bio-silica associated proteins in diatoms (Kröger *et al.*, 1999;  
335 Wenzl *et al.*, 2008; Scheffel *et al.*, 2011; Kotsch *et al.*, 2017). Despite these common features,  
336 Slp1 does not show sequence similarity with any protein known to be involved in bio-  
337 mineralization.

### 338 **Silica precipitated *in vitro* by Peptide-1 derived from Slp1 sequence**

339 In order to test the possible activity of Slp1 as a silica mineralizer we synthesized the peptide  
340 sequence HKKPVPPKPKPEPK (Peptide-1) which appears 5 times in the P, K, E-rich domain  
341 of Slp1 primary sequence. When metastable (90.9 mM) silicic acid solution was added to  
342 Peptide-1 solution (final peptide concentration 1.82 or 1.36 mg ml<sup>-1</sup>) at neutral pH, the reaction  
343 mixture became cloudy within seconds, and very fine, white sand-like powder precipitated. In  
344 contrast, a mutant peptide, where the lysine residues in Peptide-1 were replaced by alanine  
345 (HAAPVPPAPAPEPA; Peptide-3), did not precipitate powder-like silica at 90.9 mM silicic  
346 acid. Gel-like material formed when the reaction mixture was centrifuged (Fig 2a). Scanning  
347 electron micrographs of the powder sediment, forming within 5 minutes revealed spheres of  
348 about 0.5 microns in diameter (Fig. 2b). Silica was also precipitated by Peptide-1 (1.36  
349 mg ml<sup>-1</sup>) at silicic acid concentration of 5 mM (pH=7.0), which is in the lower concentration  
350 range found in grass leaves (Casey *et al.*, 2003). The precipitation was invisible to the naked  
351 eyes even after 30 minutes of incubation. However, SEM examination of the sediment showed  
352 that there indeed was silica precipitation and the diameter of an individual silica nanosphere  
353 was about 250 nm (Fig. 2c). In control solutions (without peptide) at 90.9 and 5 mM silicic  
354 acid, precipitation was not observed by SEM. High resolution transmission electron  
355 micrographs (HRTEM) of particles of 0.5 microns revealed molecular scale dark and bright  
356 regions, possibly resulting from the contrasting electron density of the peptide and poly-  
357 siloxane chains. The dark and bright patterns create a short range periodic order a few  
358 nanometers long and 1 nm thick.

### 359 **Raman and NMR spectroscopic characterization of Peptide-1 – silica precipitate**

360 The precipitated silica with Peptide-1 at 90.9 mM silicic acid was characterized by Raman and  
361 magic angle spinning (MAS) solid-state nuclear magnetic resonance (ss-NMR) spectroscopies  
362 (Fig. 3). Raman spectrum of the sediment showed that the mineral is silica, recognized by the  
363 peaks at 489 cm<sup>-1</sup> and 997 cm<sup>-1</sup> (Aksan *et al.*, 2016). These peaks are missing in the Raman  
364 spectrum of Peptide-1 (Fig. 3a). Further analysis indicated chemical interactions between the  
365 silica surface and the amino group of the lysine side chain (Supporting Information Notes S1).

366 By conducting large scale silica precipitation assay with Peptide-1 at 90.9 mM silicic acid, we  
367 could collect 113 mg of dried silica, sufficient for NMR analyses. Confirmation of the HRTEM  
368 and Raman findings that the peptide was complexed with the silica was given through NMR  
369 <sup>1</sup>H-<sup>13</sup>C cross polarization measurements (Fig. 3b). The spectrum shows narrow peaks (full  
370 width at half maximum (FWHM) was 282 Hz), as compared with spectra of a diatom peptide  
371 complexed with silica (FWHM of 489 Hz) (Geiger *et al.*, 2016). The narrow peaks allowed us

372 to identify many of the amino acid sidechain carbons, with peaks shifted to a higher field by  
373 about 2 ppm. Such shifts, caused by the silica shielding the magnetic field that is felt by the  
374 peptide, indicate of close proximity of the mineral to the peptide.

375 In order to study the structure of the mineral we collected NMR direct polarization signal from  
376 Si atoms (Fig. 3c).  $^{29}\text{Si}$  NMR can detect the number of groups of -OSi and -OH bound to a  
377 central Si atom. A Qn band is defined as  $\text{Si}-(\text{OSi})_n\text{OH}_{4-n}$  (Engelhardt & Michel, 1987). The  
378 relative intensities of the Q4:Q3:Q2 peaks in the spectrum were 62:33:5, indicating that there  
379 are about 5 bulk (Q4) Si atoms for every 3 surface (Q3+Q2) atoms. To examine further the  
380 silicon atoms at the surface we excited them through near-by hydrogen atoms, by cross  
381 polarization measurement (Fig. 3c). This measurement revealed that in addition to surface Q3  
382 and Q2 we detected some Q4 siloxane species bound to surface oxygen. These Si atoms were  
383 excited by protons from nearby silanols and water, indicating their closeness to the surface of  
384 the silica particle.

### 385 **Expression pattern and subcellular localization of Slp1**

386 Our sequence-based predictions and *in vitro* results suggested a role for Slp1 in silica  
387 deposition. To investigate whether the expression profiles of Slp1 correlate with silica  
388 deposition times and locations, we raised an antibody against Peptide-1. Using Western  
389 hybridization, we detected several bands in immature leaves and inflorescence. Slp1 expression  
390 was not detected in roots and mature leaves (Fig. 4a). In correlation with the protein expression  
391 profile, we detected RNA transcription of *Slp1* in immature leaves and inflorescences, but not  
392 in mature leaves (Fig. 4b). This profile matches regions of active silica deposition, which  
393 occurs only in young leaves but not in mature leaves. RNA transcript profile of *Slp1* along  
394 immature, silicifying leaf tissues showed that *Slp1* is strongly transcribed in the leaf base,  
395 reaching the highest levels just before the active silicification zone (ASZ-1). The transcription  
396 levels dropped by a factor of about 15 in the ASZ, and further reduced in older tissues of  
397 immature leaves (Fig. 4c). In the youngest mature leaf tissue, we found that *Slp1* is transcribed  
398 at a basic, low level constituting the background transcription level in these leaves. Background  
399 transcription level was about 1/19,000 that of the maximal transcript in ASZ-1.

400 To further correlate Slp1 with silica deposition, we tested its distribution in leaf epidermal cells  
401 using antibody against Peptide-1. In the ASZ, the antibody bound to silica cells (Fig. 5a,b). We  
402 noticed the antibody signal in either the cytoplasmic volume or near the cell periphery of silica  
403 cells (Video S1). Further image analysis suggested that the cytoplasmic immunofluorescence

404 signal originated from vesicles (Fig. 5c). In mature leaves, where silica cells are silicified and  
405 dead, the antibody hybridized only to the boundary of silica cells (Fig. 5d,e). No vesicles were  
406 identified by image analysis (Fig. 5f). Immunolocalization with the pre-immune serum, or the  
407 reactions lacking any one or both the antibodies as control did not fluoresce (Fig. S2).

408 The presence of N-terminal signal peptide in Slp1 predicted it to be secretory in nature. Hence,  
409 to verify this prediction, we made translational fusion of green fluorescent protein (GFP) to the  
410 C-terminal of full length Slp1 and transiently overexpressed it in tobacco. Similar to our  
411 observations in the silica cells of the ASZ, the cells expressing the fusion protein fluoresced in  
412 discrete packets distributed throughout the cytoplasm (Fig. 6a,b). In addition, we could identify  
413 packets fusing to the cell membrane as well as diffused fluorescence at cell boundaries (Fig.  
414 6c,d, Video S2). In control tobacco plants that overexpressed GFP without Slp1, the  
415 fluorescence was uniform in the cytoplasm and nucleus, and lower between cells (Fig. 6e,f).  
416 Mock infiltration of tobacco leaves using MES buffer did not fluoresce (Fig. 6g,h). Thus, our  
417 results show that native Slp1 is packed in vesicles inside silica cells and suggest that silica cells  
418 release Slp1 packages to the paramural space. Since the apoplasm of grass leaves is super-  
419 saturated with silicic acid, secretion of the Slp1 to the apoplast may lead to immediate silica  
420 precipitation.

#### 421 **Functional characterization of Slp1 *in planta***

422 To elucidate the role of Slp1 *in planta*, we transiently overexpressed it in sorghum, using a  
423 construct derived from maize dwarf mosaic virus. Compared with the wild type plants, control  
424 sorghum plants infected with virus lacking the Slp1 sequence showed infection lesions and  
425 viral symptoms (Fig. S3) but no unusual silica deposition (Fig. 7a-f). In contrast, the Slp1  
426 overexpressing plants had ectopic silica deposition in patches, especially close to the veins and  
427 where viral symptoms were observed (Fig. 7g-i). Silica was also deposited in cells which are  
428 not usually silicified in sorghum leaves, like guard cells, cork cells and long cells (Fig. 7j-l).  
429 SEM in the back-scattered electron mode suggested the silicification intensity to be of a level  
430 similar to that in silica cells. Similar observations were recorded in ten independent biological  
431 replicates. Energy-dispersive X-Ray spectroscopic signal for silicon from the heavily silicified  
432 patches in the Slp1 overexpressing leaves was much higher than in the wild type and control  
433 leaves. In correlation, the locations of high Si contained also high concentrations of oxygen,  
434 low concentrations of carbon, and similar background levels for other elements.

#### 435 **Discussion**

436 Silicification in plants may be passive or biologically controlled depending upon the site of  
437 deposition (Kumar *et al.*, 2017b). Out of several cell types that deposit silica in grasses, silica  
438 cells are unique as more than 95% of cells silicify in young, elongating leaves. Their  
439 mineralization requires metabolic activity and is independent of transpiration (Sangster and  
440 Parry 1971). The fast silica precipitation over a few hours (Lawton, 1980) in addition to the  
441 formation of the mineral at the cell wall, as opposed to the cytoplasm (Kumar *et al.*, 2017a;  
442 Kumar & Elbaum, 2018), point to a factor exported from the cells that induces biogenic silica  
443 formation. Our work shows that silica cells express and export the protein Slp1 to the apoplast,  
444 timed with silicification in the paramural space (Kumar *et al.*, 2017a; Kumar & Elbaum, 2018).  
445 It is obvious that silica deposition depends on the presence of silicic acid which is absorbed by  
446 roots from the soil. Typical silicic acid concentrations measured in the xylem sap are 5-7.5 mM  
447 for wheat (Casey *et al.*, 2003), 5-25 mM for rice (Ma *et al.*, 2002; Mitani & Ma, 2005), and 4,  
448 7-12 mM in sorghum seedlings and mature plants, respectively (our unpublished data). Since  
449 Slp1 overexpression caused deposition in all epidermis cell types, we can conclude that it  
450 actively precipitates silica at *in planta* silicic acid concentrations. Furthermore, the fact the  
451 silica formed ectopically in stomata and long cells indicates that Slp1 is sufficient to cause  
452 precipitation in those cells. Based on our results we conclude that Slp1 in its native form  
453 actively deposits silica *in planta*.

#### 454 **Expression patterns are in correlation with silica deposition in silica cells**

455 Slp1 expression was not detected in roots where silica cells do not form. Furthermore, we could  
456 not detect Slp1 expression in mature leaf tissues, in correlation with the absence of viable,  
457 active silica cells (Kumar & Elbaum, 2018). This suggests that silica deposition in live silica  
458 cells is dependent on Slp1, while silica deposition in cell walls and possibly other locations is  
459 governed by other means such as specific cell wall polymers (Fry *et al.*, 2008; Law & Exley,  
460 2011; Kido *et al.*, 2015; Brugière & Exley, 2017; Kulich *et al.*, 2018). Our report on Slp1  
461 expression in immature inflorescence is consistent with published transcriptomic data, showing  
462 *Slp1* transcript both before and after inflorescence emergence (Table S5 of Davidson *et al.*  
463 2012). We propose that some cell types in the inflorescence employ Slp1 to produce silica  
464 without transpiration. These may be glume abaxial epidermal cells that silicify before  
465 inflorescence emergence and macro-hairs and the long cells that are located on the abaxial  
466 epidermis of lemma, which lacks stomata and thus the transpiration stream (Hodson *et al.*,  
467 1984; Hodson, 2016; Kumar *et al.*, 2017b).

#### 468 **Possible post-translational modifications**

469 Some indication for Slp1 post-translational modifications may be the time gap between its  
470 highest transcription level in the ASZ-1 tissue, and the highest silicification activity in the ASZ  
471 (Kumar *et al.*, 2017a; Kumar & Elbaum, 2018). One such possible modification may be  
472 glycosylation (Elbaum *et al.*, 2009). Processed Slp1 molecules are then packed inside vesicles  
473 (Lawton, 1980) and stored in the cytoplasm for later release (Alberts *et al.*, 2002) at the time  
474 of silicification. Modifications may be tissue and species specific. The difference in the size of  
475 the Western hybridization signal between immature leaf and inflorescence that we observed  
476 may be attributed to differential processing of Slp1 in these two tissues. Slp1 has three RXL  
477 domains in the primary structure. RXL domains are proteolytically cleaved in many diatom  
478 biosilica associated proteins (Kröger *et al.*, 1999; Wenzl *et al.*, 2008; Scheffel *et al.*, 2011;  
479 Kotzsch *et al.*, 2016, 2017). It would be interesting to study if Slp1 undergoes alternative  
480 processing, similar to *Thalassiosira pseudonana* (a diatom species) silaffin (Poulsen & Kröger,  
481 2004).

#### 482 **Slp1 precipitates together with silicic acid creating highly porous biosilica**

483 Binding of anti-Peptide-1 antibody in the boundary of dead silica cells of mature leaves  
484 suggests that as Slp1 templates the silica precipitation, it is caught inside the silica structure.  
485 Silicanin-1, a biosilica associated protein from *T. pseudonana* gets embedded inside biosilica  
486 structure and is accessible to anti-silicanin-1 antibody (Kotzsch *et al.*, 2017). Similarly, anti-  
487 Peptide-1 antibody may also have access to the epitope remains on the surface of the deposited  
488 silica in silica cells. Our *In-vitro* experiments support such entrapment, with significant shifts  
489 in the NMR and Raman peaks, indicating close proximity between the peptide and the mineral.  
490 The periodic short-range order, as seen in HRTEM, suggests a very intimate interaction of the  
491 forming mineral and the peptide, similarly to a peptide derived from Silaffin3, a silica  
492 precipitating protein from diatom (Iline-Vul *et al.*, 2018). The mineral that we produced *in vitro*  
493 contains many surface Si atoms, forming an open mesoporous structure. Similarly, native plant  
494 silica may form a permeable matrix that will allow movement of solutes. Diffusion of silicic  
495 acid through the mineral is required in order for silica cells to fully silicify, because the  
496 mineralization front is at the paramural space (Kumar & Elbaum, 2017, 2018; Kumar *et al.*,  
497 2017a).

#### 498 **Conclusions**

499 Over-expression and localization studies of Slp1 show that this protein is involved in  
500 silicification in sorghum leaf silica cells. Slp1 has unique amino acid composition, charge  
501 distribution and probably post-translational modifications necessary for its activity. Soon after



502 cell division, silica cells start their preparation for silicification. Slp1 is transcribed, translated,  
503 and post-translationally modified, packed inside vesicles and stored in the cytoplasm until the  
504 cell is ready to silicify. The vesicles fuse to the membrane and release their content in the  
505 paramural space to come in contact with silicic acid. This immediately precipitates open-  
506 structured silica that allows the diffusion of more silicic acid from the apoplastic space. The  
507 rapid formation of the mineral explains the difficulty associated with finding silicification in  
508 an intermediate state. The expression pattern, localization and modifications of Slp1 in the  
509 inflorescence bracts need to be studied in detail.

510 **Accession number:** The nucleotide sequence of *Sorghum bicolor* Slp1 has been submitted to  
511 NCBI with the GenBank accession number- MH558953. GenBank accession number of the  
512 pBIN19 plasmid is U09365.1. The MDMV-GUS plasmid that we used in the current study is  
513 covered by a published patent number WO2016125143  
514 (<https://patentscope.wipo.int/search/en/detail.jsf?docId=WO2016125143>).

#### 515 **Acknowledgements**

516 S.K. was a recipient of post-doctoral fellowship from Planning and Budgeting Committee  
517 (PBC), Council of Higher Education, Israel. This research was funded by the Israel Science  
518 Foundation grant 534/14. Partial support to the Centre for Scientific Imaging, Hebrew  
519 University (Rehovot campus) by a grant from USAID (AID-ASHA-G 1400005) to the  
520 American Friends of The Hebrew University and The Robert H Smith Faculty of Agriculture,  
521 Food and Environment is gratefully acknowledged. The authors thank. Shmuel Wolf for the  
522 pBIN-GFP plasmid, and Nerya Zexer and Victor M. Rodriguez Zancajo for measuring silicic  
523 acid concentration in sorghum sap.

#### 524 **Author Contributions**

525 S.K. and R.E. planned and designed the research; S.K. identified Slp1 from the list of putative  
526 silicification related proteins and performed most of the experiments; N.A.-F. did the NMR  
527 spectroscopy and analysed the data with G.G.; S.B. performed parts of the experiments; S.K.  
528 and J.A.S.-L. performed immunolocalization experiment under the supervision of Y.H.; O.T.  
529 analysed the microarray data and prepared the list of Si responsive genes in sorghum; A.O.  
530 prepared the MDMV construct under the supervision of H.V.; S.K. and R.E. analyzed the  
531 results and wrote the paper. All the authors commented and approved the final version of the  
532 manuscript for publication.

#### 533 **References**

- 534 **Aksan A, Hubel A, Reategui E. 2016.** Patent no. US 9492271B2. [WWW document] URL  
535 <https://patents.google.com/patent/US9492271> [accessed 04 June 2019] Silica-based  
536 composite ocular device and methods.
- 537 **Alberts B, Johnson A, Lewin J, Raff M, Roberts K, Walter P. 2002.** *Molecular Biology of*  
538 *the Cell*. New York: Garland Science.
- 539 **Alexandre A, Basile-Doelsch I, Delhaye T, Borshneck D, Mazur JC, Reyerson P, Santos**  
540 **GM. 2015.** New highlights of phytolith structure and occluded carbon location: 3-D X-ray  
541 microscopy and NanoSIMS results. *Biogeosciences* **12**: 863–873.
- 542 **Brugière T, Exley C. 2017.** Callose-associated silica deposition in Arabidopsis. *Journal of*  
543 *Trace Elements in Medicine and Biology* **39**: 86–90.
- 544 **Casey WH, Kinrade SD, Knight CTG, Rains DW, Epstein E. 2003.** Aqueous silicate  
545 complexes in wheat, *Triticum aestivum* L. *Plant, Cell and Environment* **27**: 51–54.
- 546 **Chain F, Côté-Beaulieu C, Belzile F, Menzies JG, Bélanger RR. 2009.** A comprehensive  
547 transcriptomic analysis of the effect of silicon on wheat plants under control and pathogen  
548 stress conditions. *Molecular Plant-Microbe Interactions* **22**: 1323–1330.
- 549 **Combet C, Blanchet C, Geourjon C, Deléage G. 2000.** NPA@: Network Protein Sequence  
550 Analysis. *Trends in Biochemical Sciences* **25**: 147–150.
- 551 **Coskun D, Deshmukh R, Sonah H, Menzies JG, Reynolds O, Ma JF, Kronzucker HJ,**  
552 **Bélanger RR. 2018.** The controversies of silicon's role in plant biology. *New Phytologist*.
- 553 **Davidson RM, Gowda M, Moghe G, Lin H, Vaillancourt B, Shiu S-H, Jiang N, Robin**  
554 **Buell C. 2012.** Comparative transcriptomics of three Poaceae species reveals patterns of gene  
555 expression evolution. *The Plant journal* **71**: 492–502.
- 556 **Dosztányi Z, Csizmok V, Tompa P, Simon I. 2005a.** IUPred: web server for the prediction  
557 of intrinsically unstructured regions of proteins based on estimated energy content.  
558 *Bioinformatics* **21**: 3433–3434.
- 559 **Dosztányi Z, Csizmók V, Tompa P, Simon I. 2005b.** The pairwise energy content estimated  
560 from amino acid composition discriminates between folded and intrinsically unstructured  
561 proteins. *Journal of Molecular Biology* **347**: 827–839.
- 562 **Elbaum R, Melamed-Bessudo C, Tuross N, Levy AA, Weiner S. 2009.** New methods to  
563 isolate organic materials from silicified phytoliths reveal fragmented glycoproteins but no  
564 DNA. *Quaternary International* **193**: 11–19.
- 565 **Emanuelsson O, Nielsen H, Brunak S, Von Heijne G. 2000.** Predicting subcellular  
566 localization of proteins based on their N-terminal amino acid sequence. *Journal of Molecular*  
567 *Biology* **300**: 1005–1016.
- 568 **Engelhardt G, Michel D. 1987.** *High resolution solid state NMR of silicates and zeolites*.  
569 Chichester: John Wiley & Sons.
- 570 **Epstein E. 1994.** The anomaly of silicon in plant biology. *Proceedings of the National*  
571 *Academy of Sciences of the United States of America* **91**: 11–17.
- 572 **Fry SC, Nesselrode BHWA, Miller JG, Mewburn BR. 2008.** Mixed-linkage (1→3,1→4)-  
573 β-D-glucan is a major hemicellulose of *Equisetum* (horsetail) cell walls. *New Phytologist*  
574 **179**: 104–115.

- 575 **Geiger Y, Gottlieb HE, Akbey Ü, Oschkinat H, Goobes G. 2016.** Studying the  
576 conformation of a silaffin-derived pentylsine peptide embedded in bioinspired silica using  
577 solution and dynamic nuclear polarization magic-angle spinning NMR. *Journal of the*  
578 *American Chemical Society* **138**: 5561–5567.
- 579 **Harrison CC. 1996.** Evidence for intramineral macromolecules containing protein from  
580 plant silicas. *Phytochemistry* **41**: 37–42.
- 581 **Hodson MJ. 2016.** The development of phytoliths in plants and its influence on their  
582 chemistry and isotopic composition. Implications for palaeoecology and archaeology.  
583 *Journal of Archaeological Science* **68**: 62–69.
- 584 **Hodson MJ, Sangster AG, Parry DW. 1984.** An ultrastructural study on the development  
585 of silicified tissues in the lemma of *Phalaris canariensis* L. *Proceedings of the Royal Society*  
586 *of London B* **222**: 413–425.
- 587 **Hodson MJ, Sangster AG, Parry DW. 1985.** An ultrastructural study on the developmental  
588 phases and silicification of the glumes of *Phalaris canariensis* L. *Annals of Botany* **55**: 649–  
589 665.
- 590 **Hodson MJ, White PJ, Mead A, Broadley MR. 2005.** Phylogenetic variation in the silicon  
591 composition of plants. *Annals of Botany* **96**: 1027–1046.
- 592 **Iline-Vul T, Adiram-Filiba N, Matlahov I, Geiger Y, Abayev M, Keinan-Adamsky K,**  
593 **Akbey U, Oschkinat H, Goobes G. 2018.** Understanding the roles of functional peptides in  
594 designing apatite and silica nanomaterials biomimetically using NMR techniques. *Current*  
595 *Opinion in Colloid and Interface Science* **33**: 44–52.
- 596 **Jose-Estanyol M. 2013.** Maize embryo transient transformation by particle bombardment.  
597 *Bio-protocol* **3**: e865.
- 598 **Kaufman PB, Bigelow WC, Petering LB, Drogosz FB. 1969.** Silica in developing  
599 epidermal cells of avena internodes: electron microprobe analysis. *Science* **166**: 1015–1017.
- 600 **Kaufman PB, Dayanandan P, Franklin CI. 1985.** Structure and function of silica bodies in  
601 the epidermal system of grass shoots. *Annals of Botany* **55**: 487–507.
- 602 **Kauss H, Seehaus K, Franke R, Gilbert S, Dietrich RA, Kröger N. 2003.** Silica deposition  
603 by a strongly cationic proline-rich protein from systemically resistant cucumber plants. *The*  
604 *Plant Journal* **33**: 87–95.
- 605 **Kido N, Yokoyama R, Yamamoto T, Furukawa J, Iwai H, Satoh S, Nishitani K. 2015.**  
606 The matrix polysaccharide (1;3,1;4)-2- $\beta$ -glucan is involved in silicon-dependent  
607 strengthening of rice cell wall. *Plant and Cell Physiology* **56**: 268–276.
- 608 **Kotzsch A, Gröger P, Pawolski D, Bomans PHH, Sommerdijk NAJM, Schlierf M,**  
609 **Kröger N. 2017.** Silicanin-1 is a conserved diatom membrane protein involved in silica  
610 biomineralization. *BMC Biology* **15**: 65.
- 611 **Kotzsch A, Pawolski D, Milentyev A, Shevchenko A, Scheffel A, Poulsen N, Shevchenko**  
612 **A, Kröger N. 2016.** Biochemical composition and assembly of biosilica-associated insoluble  
613 organic matrices from the diatom *Thalassiosira pseudonana*. *Journal of Biological Chemistry*  
614 **291**: 4982–4997.
- 615 **Kröger N, Deutzmann R, Sumper M. 1999.** Polycationic peptides from diatom biosilica  
616 that direct silica nanosphere formation. *Science* **286**: 1129–1132.

- 617 **Kulich I, Vojtková Z, Sabol P, Ortmannová J, Neděla V, Tihlaříková E, Žárský V.**  
618 **2018.** Exocyst subunit EXO70H4 has a specific role in callose synthase secretion and silica  
619 accumulation. *Plant Physiology*: pp.01693.2017.
- 620 **Kumar S, Elbaum R. 2017.** Estimation of silica cell silicification level in grass leaves using  
621 in situ charring method. *Bio-protocol* **7**: e2607.
- 622 **Kumar S, Elbaum R. 2018.** Interplay between silica deposition and viability during the life  
623 span of sorghum silica cells. *New Phytologist* **217**: 1137–1145.
- 624 **Kumar S, Milstein Y, Brama Y, Elbaum M, Elbaum R. 2017a.** Mechanism of silica  
625 deposition in sorghum silica cells. *New Phytologist* **213**: 791–798.
- 626 **Kumar S, Soukup M, Elbaum R. 2017b.** Silicification in grasses: variation between  
627 different cell types. *Frontiers in Plant Science* **8**: 438.
- 628 **Law C, Exley C. 2011.** New insight into silica deposition in horsetail (*Equisetum arvense*).  
629 *BMC Plant Biology* **11**: 112.
- 630 **Lawton JR. 1980.** Observations on the structure of epidermal cells, particularly the cork and  
631 silica cells, from the flowering stem internode of *Lolium temulentum* L. (Gramineae).  
632 *Botanical Journal of the Linnean Society* **80**: 161–177.
- 633 **Li X. 2011.** Infiltration of *Nicotiana benthamiana* protocol for transient expression via  
634 *Agrobacterium*. *Bio-protocol* **1**: e95.
- 635 **Ma JF, Tamai K, Ichii M, Wu GF. 2002.** A rice mutant defective in Si uptake. *Plant*  
636 *Physiology* **130**: 2111–2117.
- 637 **Ma JF, Tamai K, Yamaji N, Mitani N, Konishi S, Katsuhara M, Ishiguro M, Murata Y,**  
638 **Yano M. 2006.** A silicon transporter in rice. *Nature* **440**: 688–691.
- 639 **Ma JF, Yamaji N, Mitani N, Tamai K, Konishi S, Fujiwara T, Katsuhara M, Yano M.**  
640 **2007.** An efflux transporter of silicon in rice. *Nature* **448**: 209–212.
- 641 **Markovich O, Kumar S, Cohen D, Addadi S, Fridman E, Elbaum R. 2015.** Silicification  
642 in leaves of sorghum mutant with low silicon accumulation. *Silicon* doi: 10.1007/s12633-  
643 015-9348-x.
- 644 **Massiot D, Fayon F, Capron M, King I, Le Calvé S, Alonso B, Durand J-O, Bujoli B,**  
645 **Gan Z, Hoatson G. 2002.** Modelling one- and two-dimensional solid-state NMR spectra.  
646 *Magnetic Resonance in Chemistry* **40**: 70–76.
- 647 **Mitani N, Ma JF. 2005.** Uptake system of silicon in different plant species. *Journal of*  
648 *experimental botany* **56**: 1255–1261.
- 649 **Motomura H, Fujii T, Suzuki M. 2000.** Distribution of silicified cells in the leaf blades of  
650 *Pleioblastus chino* (Franchet et Savatier) Makino (Bambusoideae). *Annals of Botany* **85**:  
651 751–757.
- 652 **Perry CC. 2003.** Silicification: The processes by which organisms capture and mineralize  
653 silica. *Reviews in Mineralogy and Geochemistry* **54**: 291–327.
- 654 **Perry CC, Mann S, Williams RJP. 1984.** Structural and analytical studies of the silicified  
655 macrohairs from the lemma of the grass *Phalaris canariensis* L. *Proceedings of the Royal*  
656 *Society of London B* **222**: 427–438.

- 657 **Petersen TN, Brunak S, von Heijne G, Nielsen H. 2011.** SignalP 4.0: discriminating signal  
658 peptides from transmembrane regions. *Nature Methods* **8**: 785–786.
- 659 **Pfaffl MW. 2001.** A new mathematical model for relative quantification in real-time RT-  
660 PCR. *Nucleic acids research* **29**: 2002–2007.
- 661 **Poulsen N, Kröger N. 2004.** Silica morphogenesis by alternative processing of silaffins in  
662 the diatom *Thalassiosira pseudonana*. *The Journal of Biological Chemistry* **279**: 42993–  
663 42999.
- 664 **Scheffel A, Poulsen N, Shian S, Kröger N. 2011.** Nanopatterned protein microrings from a  
665 diatom that direct silica morphogenesis. *Proceedings of the National Academy of Sciences of*  
666 *the United States of America* **108**: 3175–3180.
- 667 **Shakoor N, Nair R, Crasta O, Morris G, Feltus A, Kresovich S. 2014.** A *Sorghum bicolor*  
668 expression atlas reveals dynamic genotype-specific expression profiles for vegetative tissues  
669 of grain, sweet and bioenergy sorghums. *BMC plant biology* **14**: 35.
- 670 **Shimizu K, Amano T, Bari MR, Weaver JC, Arima J, Mori N. 2015.** Glassin, a histidine-  
671 rich protein from the siliceous skeletal system of the marine sponge *Euplectella*, directs silica  
672 polycondensation. *Proceedings of the National Academy of Sciences of the United States of*  
673 *America* **112**: 11449–11454.
- 674 **Shimizu K, Cha J, Stucky GD, Morse DE. 1998.** Silicatein  $\alpha$ : Cathepsin L-like protein in  
675 sponge biosilica. *Proceedings of the National Academy of Sciences of the United States of*  
676 *America* **95**: 6234–6238.
- 677 **Skinner RH, Nelson CJ. 1995.** Elongation of the grass leaf and its relationship to the  
678 phyllochron. *Crop Science* **35**: 4–10.
- 679 **Wenzl S, Hett R, Richthammer P, Sumper M. 2008.** Silacidins: Highly acidic  
680 phosphopeptides from diatom shells assist in silica precipitation in vitro. *Angewandte Chemie*  
681 **47**: 1729–1732.
- 682 **Yamaji N, Mitatni N, Ma JF. 2008.** A transporter regulating silicon distribution in rice  
683 shoots. *The Plant Cell* **20**: 1381–1389.

684

## 685 **Supplementary Information**

686 **Fig. S1** Transcript level of *RRM* in relation to *UbCE* as internal control gene, showing that the  
687 transcript level of the two house-keeping genes do not change significantly in the tested tissues.

688 **Fig. S2** Immunolocalization control reactions using pre-immune serum; or lacking either one  
689 or both the antibodies.

690 **Fig. S3** Maize dwarf mosaic virus (MDMV) infected sorghum plants showing symptoms.

691

692 **Table S1** List of primers used in the present study.

693 **Table S2** List of the wheat (genes identified that show significantly differential transcription  
694 upon silicon treatment verses the non-treated plants, and their *Sorghum bicolor* homologues.

695

696 **Video S1** Confocal microscopy video clip showing Slp1 localization in the cytoplasmic space  
697 and near the cell boundary of silica cells.

698 **Video S2** Confocal microscopy video clip showing the vesicles packed Slp1 fusing to the cell  
699 membrane.

700 **Notes S1** Raman analysis

701

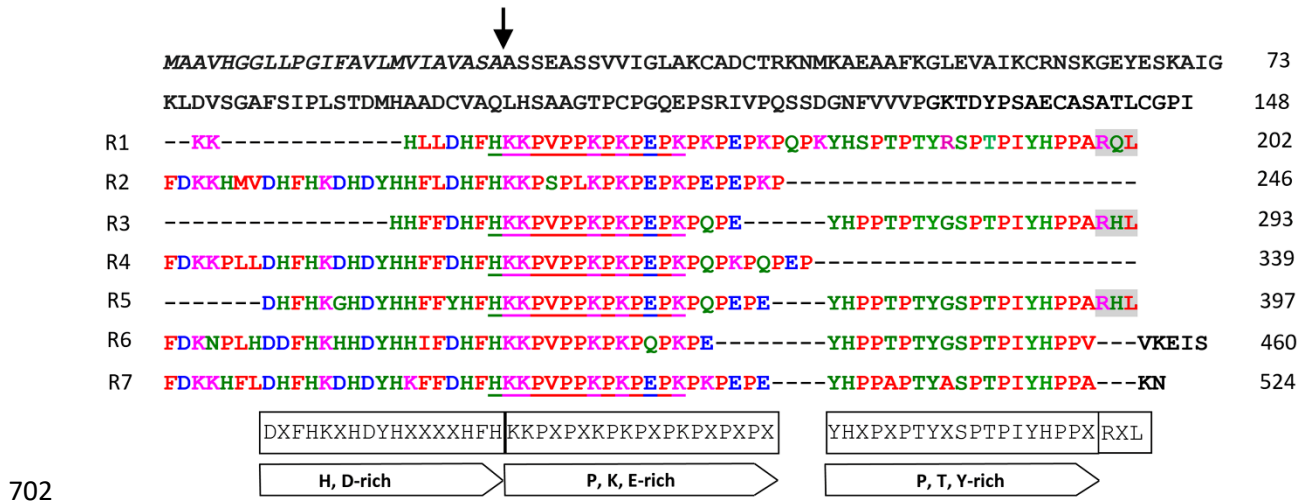

702

703

704 **Fig. 1** Primary sequence of *Sorghum bicolor* Slp1, showing the N-terminal signal sequence and  
 705 the seven repeats (R1-R7). The predicted signal sequence is shown in italics. The arrow denotes  
 706 the predicted signal sequence cleavage site. All the repeats (R1-R7) have a proline, lysine and  
 707 glutamic acid rich (P, K, E-rich) domain forming a zwitterionic center. In addition, a histidine-  
 708 aspartic acid rich (H, D-rich) domain, negatively charged near physiological pH precedes the  
 709 P, K, E-rich domain in repeats 2, 4, 5, 6 and 7. Whereas, a proline, threonine and tyrosine rich  
 710 (P, T, Y-rich) domain follows the P, K, E-rich domain in repeats 1, 3, 5, 6 and 7. At the end of  
 711 repeats 1, 3 and 5, there is an RXL domain (shaded) which serves as cleavage site for unknown  
 712 proteases in many bio-silica associated proteins in diatoms. The underlined sequence is  
 713 Peptide-1 which appears five times in the primary sequence and was used for raising antibodies  
 714 and for silica precipitation assays. The consensus sequence for the domains is given in boxes  
 715 below each domain, where X denotes any amino acid.

716

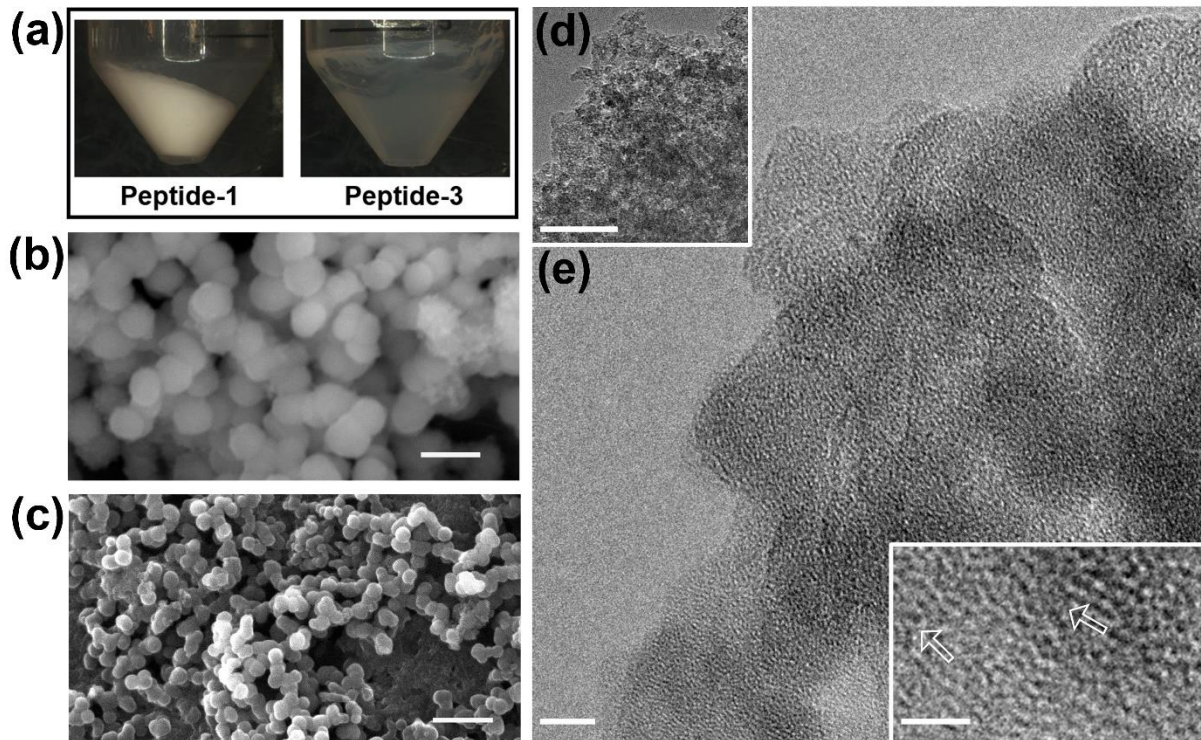

717

718 **Fig. 2** Imaging of silica precipitation by peptides derived from *Sorghum bicolor* Slp1 sequence.  
719 (a) Sand-like powder sediment produced from metastable (90.9 mM) silicic acid solution with  
720 Peptide-1, while a gel-like material formed after several rounds of centrifugation of silicic acid  
721 solution with Peptide-3. (b) Scanning electron micrograph of the powder sediment formed by  
722 Peptide-1 at 90.9 mM silicic acid. (c) Scanning electron micrograph of the silica sediment  
723 formed by Peptide-1 at 5 mM silicic acid. (d) High-resolution transmission electron microscopy  
724 (HRTEM) of one particle imaged in panel (b) reveals a mesoporous structure on a nanometric  
725 scale. Bar, 5 nm. (e) Dark and bright granulation have short-range order, as marked by arrows  
726 in the inset panel. Bars of 1  $\mu\text{m}$  in panels (b, c), 60 nm  $\mu\text{m}$  in (d), 5 nm in (e), and 2 nm in (e-  
727 inset).

728

729



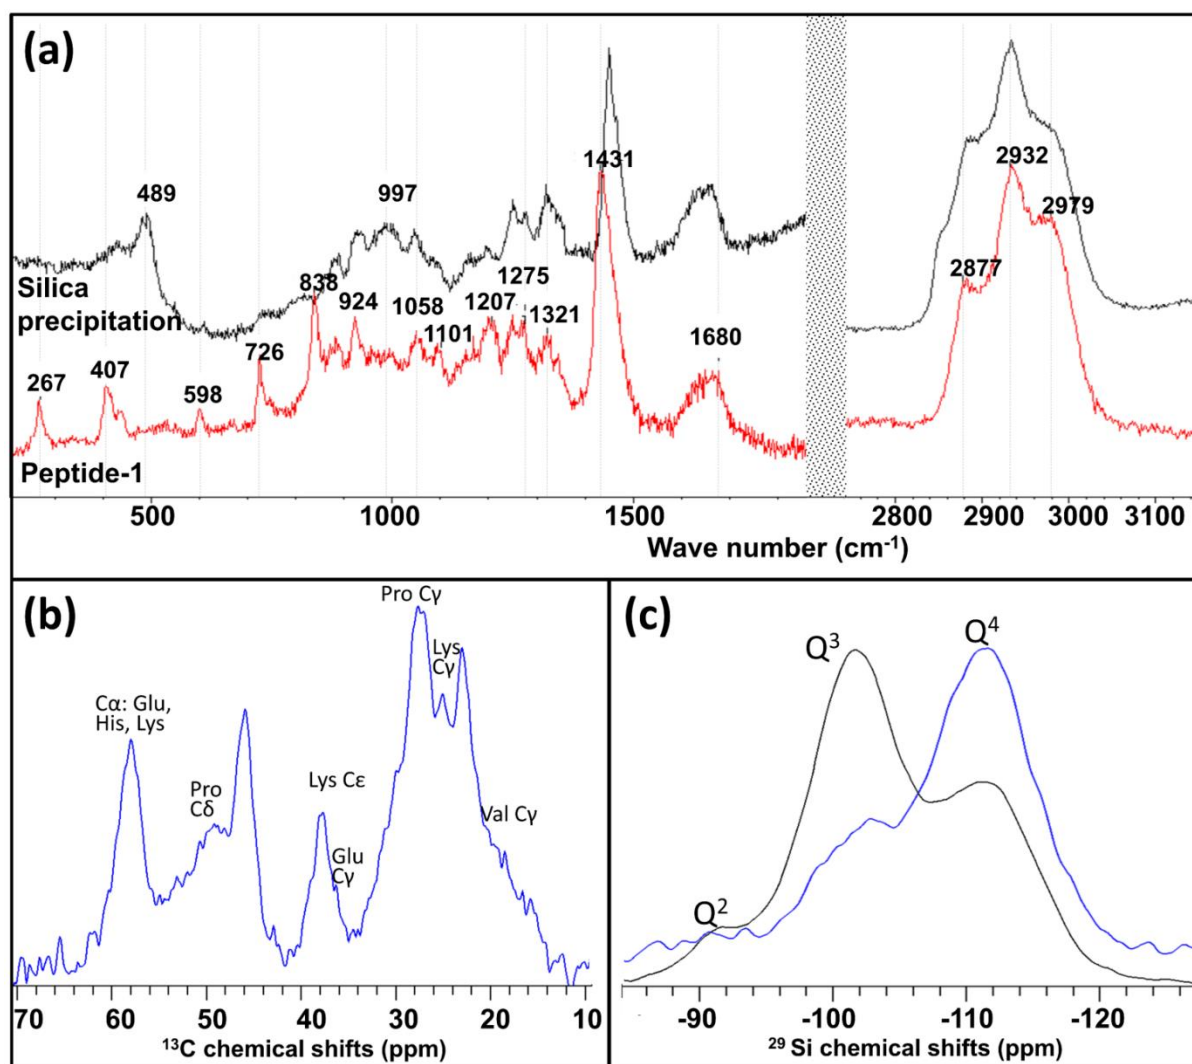

730

731 **Fig. 3** Characterization of the peptide-silica sediment using Raman and NMR spectroscopy.  
 732 (a) Raman spectra of Peptide-1 (red line) and the sediment formed with Peptide-1 (black line).  
 733 The spectra show that the mineral is silica, with altered surface, and that the peptide is bound  
 734 to the mineral through the lysine aliphatic amine and proline ring residues and the -COO<sup>-</sup> C-  
 735 terminal group. See Note S1 for peak assignment. (b) Spectrum of the peptide-silica sediment,  
 736 measured by magic angle spinning (MAS) solid-state nuclear magnetic resonance (ss-NMR)  
 737 <sup>1</sup>H-<sup>13</sup>C cross polarization. The NMR signals, typical to aliphatic bonds in the amino acid  
 738 sidechain, are shifted to a high field by about 2 ppm. These shifts reflect a shielding effect of  
 739 the silica, suggesting that the sidechains are bound to the mineral. (c) Spectra of <sup>29</sup>Si showing  
 740 peaks of Si-(OSi)<sub>2</sub>(OH)<sub>2</sub> (Q<sup>2</sup>); Si-(OSi)<sub>3</sub>(OH) (Q<sup>3</sup>); and Si-(OSi)<sub>4</sub> (Q<sup>4</sup>). Direct polarization  
 741 (black line) samples all the Si atoms in the sample, while <sup>1</sup>H-cross polarization (blue line)  
 742 samples Si atoms in proximity to protons.

743

744

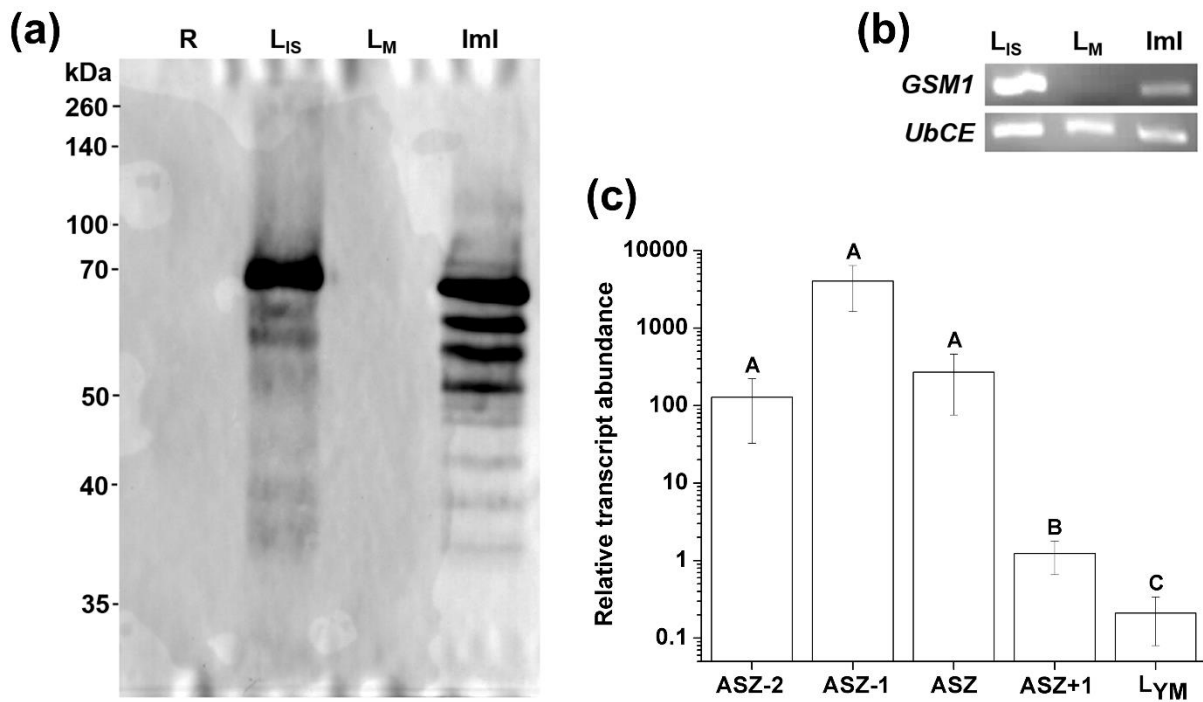

745

746 **Fig. 4** Expression profile of *Sorghum bicolor* Slp1. (a) Western blot of crude protein extract  
747 from roots (R), immature silicifying leaves (L<sub>IS</sub>), mature leaves (L<sub>M</sub>), and immature  
748 inflorescences (ImI), detected by an antibody against Peptide-1. Slp1 was expressed in  
749 developing leaves and inflorescence, but not in roots and mature leaves. Multiple sized bands  
750 in the inflorescence may indicate that Slp1 is processed differently in immature leaf and  
751 inflorescence. (b) RNA transcription of *Slp1* in immature silicifying leaves (L<sub>IS</sub>), mature leaves  
752 (L<sub>M</sub>), and immature inflorescences (ImI). In accordance with protein translation, transcription  
753 was detected only in the immature tissues. *UbCE* (ubiquitin-conjugating enzyme) was used as  
754 internal control gene. (c) RNA transcript profile of *Slp1* along immature silicifying leaf tissues.  
755 Maximal transcript was found in ASZ-1, which lies just below the Active Silicification Zone  
756 (ASZ). Error bars indicate standard deviation (n=3).

757

758

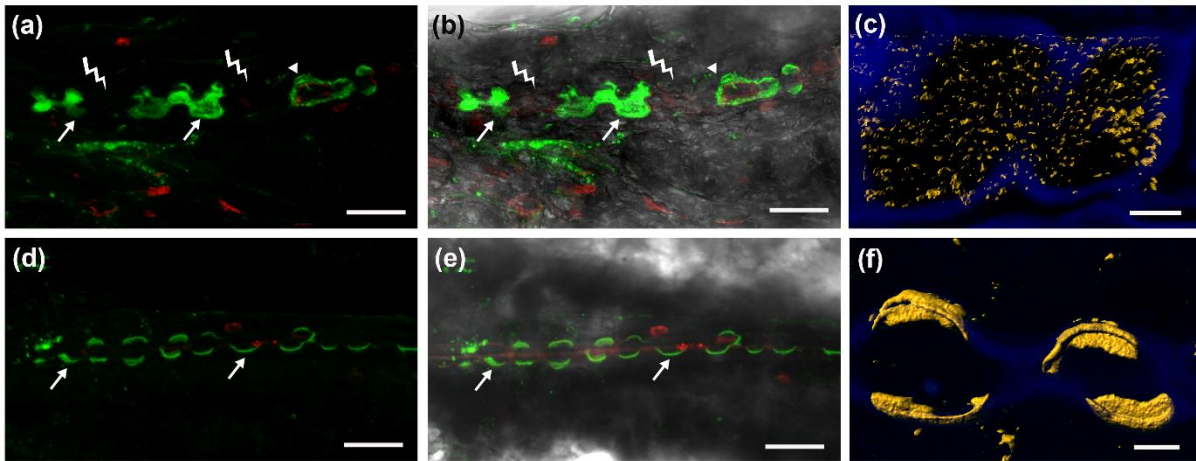

759

760 **Fig. 5** Immunolocalization of *Sorghum bicolor* Slp1 in the active silicification zone (ASZ) of  
761 young leaves (a-c), and near the tips of fully silicified mature leaves (d-f). In sorghum leaves,  
762 silica cells usually pair with cork cells (indicated by thunder sign) and exist as long chains of  
763 alternating silica and cork cells; but near the leaf tip, cork cells are absent and silica cells fuse  
764 to form long polylobate bodies. (a) Immunolocalization (green fluorescence) shows that Slp1  
765 is localized to silica cells of sorghum leaf active silicification zone (ASZ), inside the cytoplasm  
766 (arrows) or near the cell periphery (arrowhead). (b) Fluorescence image in (a) merged with the  
767 corresponding brightfield image. (c) The anti-peptide-1 antibody fluorescence was processed  
768 to select for punctuated regions (pseudocoloured yellow) in the ASZ. The Slp1 appears in  
769 packets in the cytoplasm and cell boundary. (d) The anti-peptide-1 antibody (green  
770 fluorescence) binds to the edges of silicified silica cells (arrows) in mature leaves. (e)  
771 Fluorescence image in (d) merged with the corresponding brightfield image. (f) Processed  
772 fluorescence of mature leaf image demonstrates that peptide-1 (pseudocoloured yellow) is  
773 embedded inside the polymerized silica. Red fluorescence is from propidium iodide, blue is  
774 background autofluorescence of the cell walls. Bar 25  $\mu\text{m}$  in panels (a, b, d, e) and 4  $\mu\text{m}$  in  
775 panels (c) and (f).

776

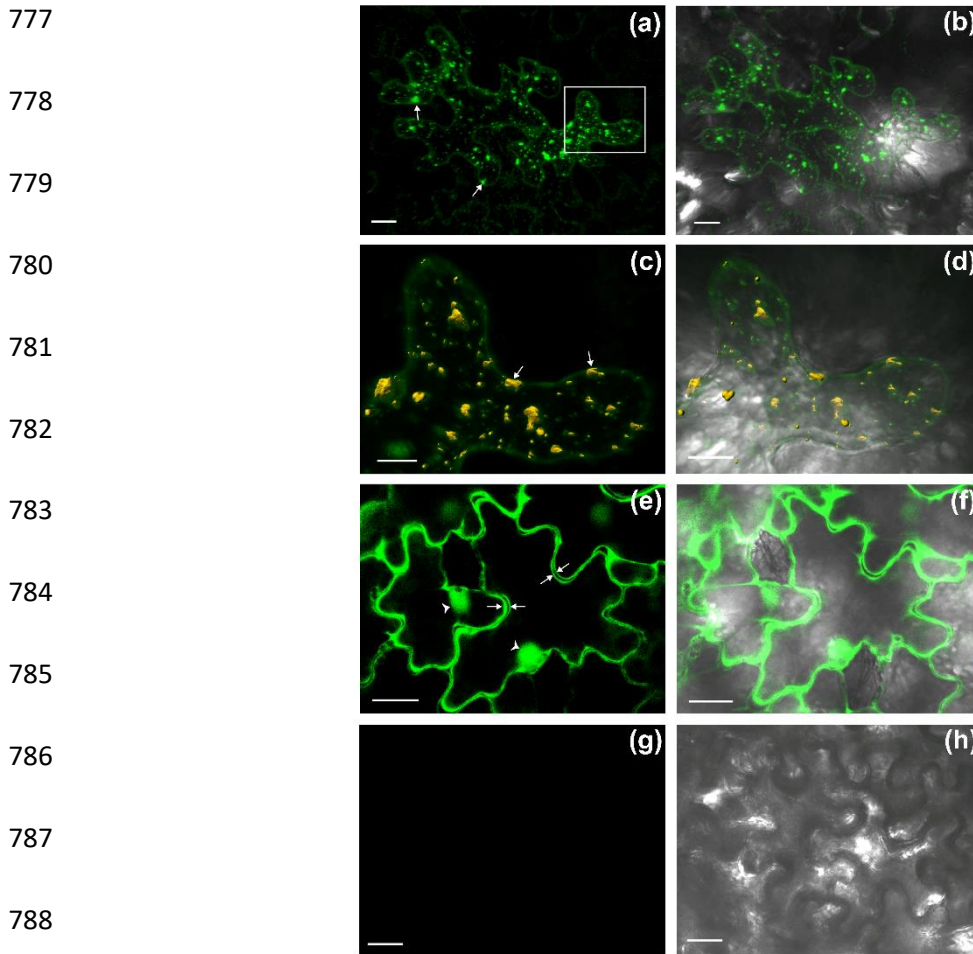

789 **Fig. 6** Fluorescence confocal microscopy showing the secretory nature of *Sorghum bicolor*  
790 Slp1. (a) Slp1 fused with GFP was transiently overexpressed in tobacco leaf using  
791 *Agrobacterium tumefaciens*. The green fluorescence, marking the location of Sil, was found in  
792 packets inside the cytoplasm (arrows), while diffused green fluorescence can also be seen along  
793 the margin of the cell. White rectangle marks a region enlarged in panel (c). (b) Fluorescent  
794 image in (a) merged with the corresponding brightfield image. (c) Segmenting the green  
795 fluorescence to diffuse (green) and punctate (pseudocoloured yellow) regions shows packets  
796 fusing to the cell membrane (arrows) as well as diffused fluorescence at cell boundaries. (d)  
797 Fluorescent image in (c) merged with the corresponding brightfield image (e) Control plants  
798 expressing GFP without Slp1 showing green uniform fluorescence of the cytoplasm and  
799 nucleus (arrowheads). Arrows indicate the cytoplasm of adjacent cells, demonstrating the low  
800 fluorescence between cells. (f) Fluorescent image in (e) merged with the corresponding  
801 brightfield image. (g) Mock infiltration of tobacco leaves using MES buffer did not fluoresce.  
802 (h) Fluorescent image in (h) merged with corresponding brightfield image. Bars in panels (a,  
803 b, e, f, g, h) are 20  $\mu\text{m}$ , and in (c, d) are 10  $\mu\text{m}$ .

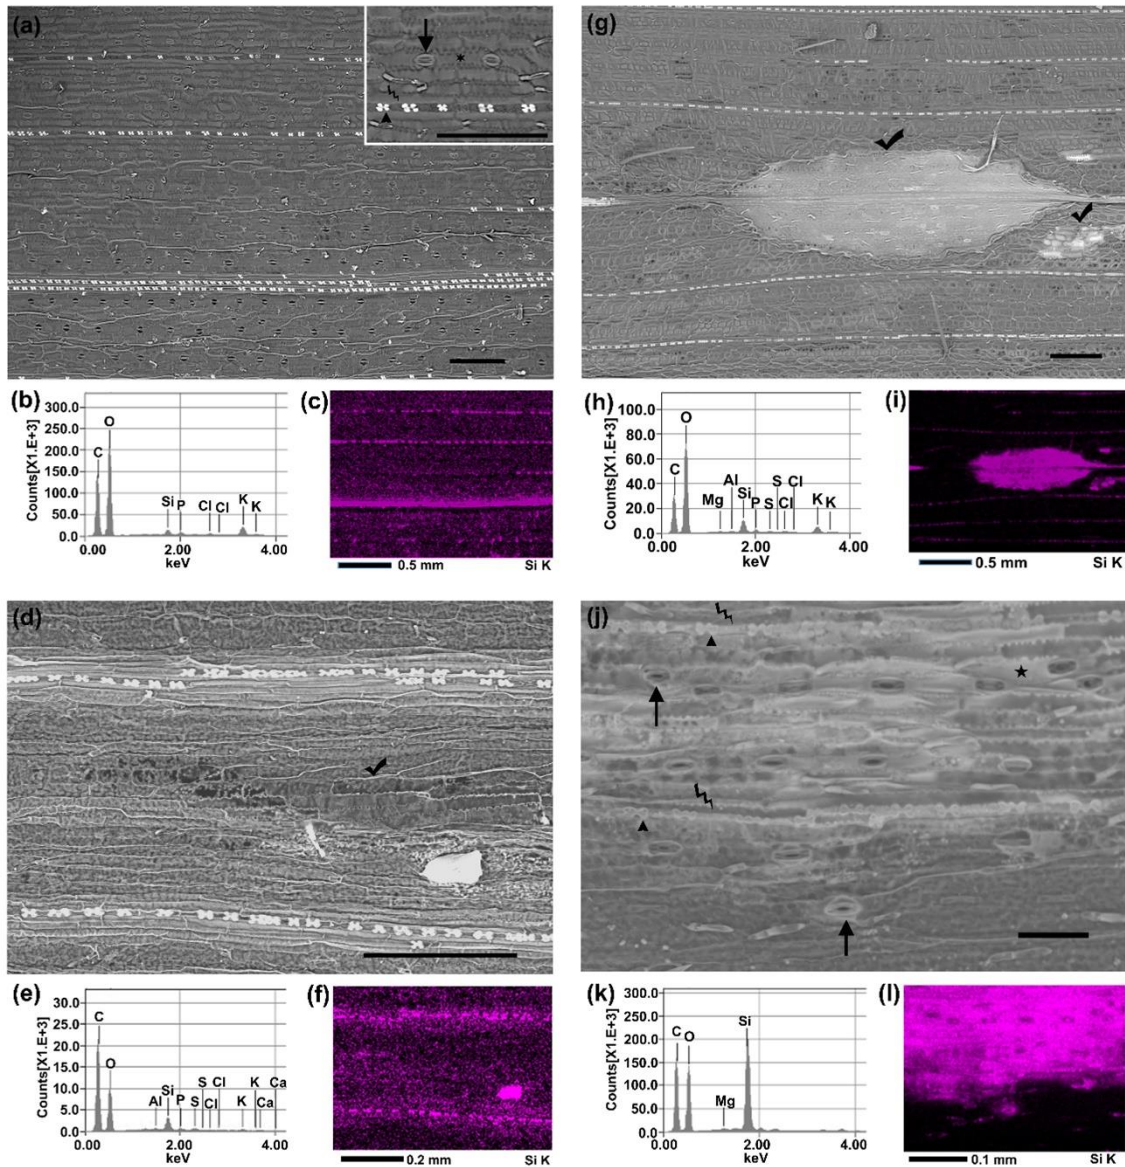

804

805 **Fig. 7** Overexpression of *Sorghum bicolor* Slp1 in sorghum. Arrowheads indicate silica cells,  
 806 arrows- stomata, thunder signs- cork cells, stars- long cells and tick mark indicate viral lesions.  
 807 (a,d,g,j) Scanning electron microscope (SEM) image in back-scattered electron (BSE) mode.  
 808 Silicified cells appear brighter compared with the background. (b,e,h,k) Energy-dispersive X-  
 809 ray spectra (EDS) of the corresponding SEM image showing the comparative elemental  
 810 composition of the scanned area. (c,f,i,l) EDS map for Si-signal from the corresponding SEM  
 811 image. Maps are pseudocoloured. Black colour means no signal and increasing intensity of the  
 812 colour denotes higher density of Si atoms. (a) Wild type sorghum mature leaf scanned by SEM  
 813 under low magnification showing the general silicification pattern in a mature leaf. Inset:  
 814 epidermal cell types are indicated in a higher magnification image. (b) EDS of the image in (a).  
 815 (c) EDS map for Si-signal of the image in (a). (d) SEM image of control plants showing  
 816 silicification only at usual locations. Dust particle with high Si content is seen on the bottom

817 right. (f) EDS map for Si of the image in (d). (g) SEM image of ectopic silica deposition in a  
818 viral lesion in Slp1 overexpressing plant. (h) EDS of the image in (g). (i) EDS map for Si of  
819 the image in (g). (j) SEM image of Slp1 overexpressing plants showing high intensity silica  
820 deposition in cells that do not usually silicify in wild type plants. All epidermal cell types can  
821 be seen silicified. (k) EDS of the image in (j). (l) EDS map for Si of the image in (j). Bars  
822 represent 200  $\mu\text{m}$  in panels (a; d and g); and 50  $\mu\text{m}$  in panel (j).
